# Supplementary material
Source: PubMed Central journal article supplement (PMC2206549)

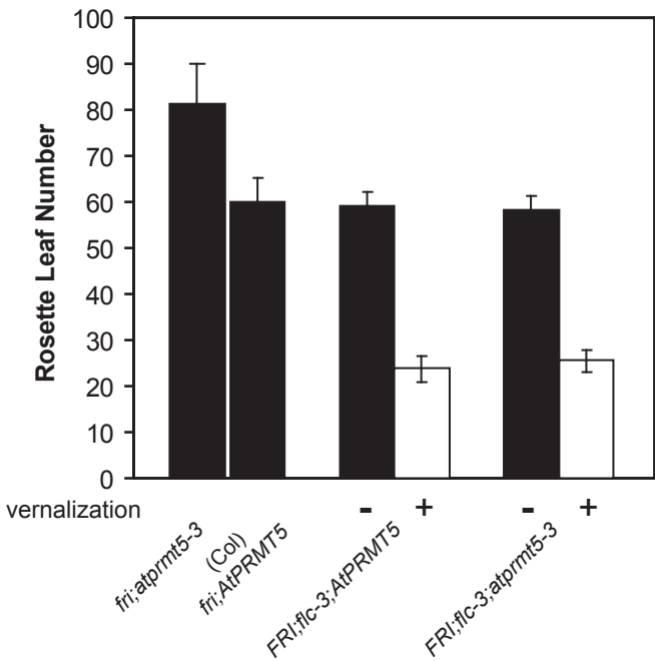

Supplement: pnas_0710423104_1.pdf [file pnas_0710423104_1.pdf]
